# Supplementary material for: Mutational analysis and protein profiling predict drug sensitivity in multiple myeloma cell lines
Source: Frontiers journal article supplement (doi:10.3389/fonc.2022.1040730), 2022-11-29
Supplement: Data_Sheet_1.zip [file Data_Sheet_1.zip]

**Supplementary Table 2: Computational prediction of damaging effects of mutations detected in the MM cell lines.**

| Mutated genes        | Amino acid change of mutated genes | Functional prediction |
|----------------------|------------------------------------|-----------------------|
| <b><i>EGFR</i></b>   | V592I, R832C, V592I                | damaging              |
| <b><i>ABL1</i></b>   | H929N                              | damaging              |
| <b><i>FLT1</i></b>   | I178S, E910K                       | damaging              |
| <b><i>FLT3</i></b>   | T526M                              | damaging              |
| <b><i>FLT4</i></b>   | V750M, G1328V                      | damaging              |
| <b><i>NRAS</i></b>   | G12D, G12V, Q61K                   | damaging              |
| <b><i>RAF1</i></b>   | S259F                              | damaging              |
| <b><i>ALK</i></b>    | P1213S                             | damaging              |
| <b><i>ROS1</i></b>   | S371P, R1569W                      | damaging              |
| <b><i>SYK</i></b>    | D410Y                              | damaging              |
| <b><i>PIK3CA</i></b> | H1047R, W590C                      | damaging              |
| <b><i>BRAF</i></b>   | K601N                              | damaging              |
| <b><i>ABL1</i></b>   | H929N                              | damaging              |
| <b><i>EGFR</i></b>   | V592I, R832C, V592I                | damaging              |
| <b><i>CDK13</i></b>  | V736E, G65R                        | damaging              |
| <b><i>TP53</i></b>   | E285K, K132M, L130V                | damaging              |
| <b><i>SYK</i></b>    | D410Y                              | damaging              |
| <b><i>MTOR</i></b>   | A2300D                             | damaging              |
