# Supplementary material for: Mutational analysis and protein profiling predict drug sensitivity in multiple myeloma cell lines
Source: Frontiers journal article supplement (doi:10.3389/fonc.2022.1040730), 2022-11-29
Supplement: Data_Sheet_1.zip [file Data_Sheet_1.zip]

Supplementary Table 1. List of Mutations and mutated genes

| Cell line | Chr | Pos         | Ref | Alt | Gene            | amino acid changes                              | Type                 |
|-----------|-----|-------------|-----|-----|-----------------|-------------------------------------------------|----------------------|
| CAG       |     | 1 227221075 | A   | G   | <i>CDC42BPA</i> | p.V1057A,p.V1138A                               | missense_variant     |
| CAG       | 2   | 112656320   | C   | T   | <i>MERTK</i>    | p.P3L                                           | missense_variant     |
| CAG       | 2   | 171371496   | G   | A   | <i>MYO3B</i>    | p.E1146K                                        | missense_variant     |
| CAG       | 3   | 12645693    | G   | A   | <i>RAF1</i>     | p.S259F                                         | missense_variant     |
| CAG       | 3   | 142281226   | C   | T   | <i>ATR</i>      | p.D340N                                         | missense_variant     |
| CAG       | 3   | 178952085   | A   | G   | <i>PIK3CA</i>   | p.H1047R                                        | missense_variant     |
| CAG       | 4   | 79780782    | C   | G   | <i>BMP2K</i>    | p.Q310E                                         | missense_variant     |
| CAG       | 4   | 79780831    | C   | G   | <i>BMP2K</i>    | p.S326C                                         | missense_variant     |
| CAG       | 4   | 151023668   | A   | G   | <i>DCLK2</i>    | p.K154E                                         | missense_variant     |
| CAG       | 6   | 2683312     | C   | G   | <i>MYLK4</i>    | p.Q210H                                         | missense_variant     |
| CAG       | 10  | 26315456    | G   | T   | <i>MYO3A</i>    | p.K316N                                         | missense_variant     |
| CAG       | 10  | 75574955    | C   | T   | <i>CAMK2G</i>   | p.V436I,p.V459I,p.V445I,p.V480I,p.V468I,p.V497I | missense_variant     |
| CAG       | 11  | 33374898    | A   | T   | <i>HIPK3</i>    | p.R1144S                                        | missense_variant     |
| CAG       | 12  | 14794126    | C   | T   | <i>GUCY2C</i>   | p.R653H                                         | missense_variant     |
| CAG       | 13  | 29008338    | A   | C   | <i>FLT1</i>     | p.I178S                                         | missense_variant     |
| CAG       | 17  | 7577085     | C   | T   | <i>TP53</i>     | p.E285K                                         | missense_variant     |
| CAG       | 19  | 47207621    | G   | A   | <i>PRKD2</i>    | p.R232C                                         | missense_variant     |
| IH1       | 1   | 114499807   | G   | T   | <i>HIPK1</i>    | p.V552L                                         | missense_variant     |
| IH1       | 1   | 115258747   | C   | A   | <i>NRAS</i>     | p.G12V                                          | missense_variant     |
| IH1       | 1   | 179077617   | G   | T   | <i>ABL2</i>     | p.H929N                                         | missense_variant     |
| IH1       | 5   | 14485179    | T   | G   | <i>TRIO</i>     | p.V2220G                                        | missense_variant     |
| IH1       | 9   | 93639899    | G   | T   | <i>SYK</i>      | p.D410Y                                         | missense_variant     |
| IH1       | 11  | 111574079   | G   | A   | <i>SIK2</i>     | p.G294R                                         | missense_variant     |
| IH1       | 19  | 42738703    | C   | A   | <i>GSK3A</i>    | p.G265V                                         | missense_variant     |
| INA6      | 1   | 115258747   | C   | T   | <i>NRAS</i>     | p.G12D                                          | missense_variant     |
| INA6      | 1   | 182554998   | G   | A   | <i>RNASEL</i>   | p.S315F                                         | missense_variant     |
| INA6      | 1   | 204419026   | A   | T   | <i>PIK3C2B</i>  | p.V729E                                         | missense_variant     |
| INA6      | 1   | 227152813   | C   | T   | <i>ADCK3</i>    | p.S97F                                          | missense_variant     |
| INA6      | 3   | 41504688    | C   | T   | <i>ULK4</i>     | p.V1095M                                        | missense_variant     |
| INA6      | 3   | 138433423   | T   | C   | <i>PIK3CB</i>   | p.M397V                                         | missense_variant     |
| INA6      | 5   | 1268689     | C   | T   | <i>TERT</i>     | p.S843N                                         | missense_variant     |
| INA6      | 12  | 120152023   | G   | T   | <i>CIT</i>      | p.R1387S                                        | missense_variant     |
| INA6      | 13  | 28609652    | G   | A   | <i>FLT3</i>     | p.T526M                                         | missense_variant     |
| INA6      | 17  | 7576855     | G   | A   | <i>TP53</i>     | p.Q331X                                         | stop_gained          |
| INA6      | 17  | 7578535     | T   | A   | <i>TP53</i>     | p.K132M                                         | missense_variant     |
| INA6      | 17  | 29554560    | C   | G   | <i>NF1</i>      | p.A782G                                         | missense_variant     |
| INA6      | 18  | 59854839    | A   | G   | <i>KIAA1468</i> | p.E34G                                          | missense_variant     |
| INA6      | 20  | 9546688     | G   | T   | <i>PAK7</i>     | p.P445H                                         | missense_variant     |
| JJN3      | 1   | 11181337    | G   | T   | <i>MTOR</i>     | p.A2300D                                        | missense_variant     |
| JJN3      | 1   | 22928223    | C   | T   | <i>EPHA8</i>    | p.R1003W                                        | missense_variant     |
| JJN3      | 1   | 114964110   | G   | T   | <i>TRIM33</i>   | p.S670X                                         | stop_gained          |
| JJN3      | 1   | 115258744   | C   | T   | <i>NRAS</i>     | p.G13D                                          | missense_variant     |
| JJN3      | 2   | 29443580    | G   | A   | <i>ALK</i>      | p.P1213S                                        | missense_variant     |
| JJN3      | 2   | 201726055   | T   | C   | <i>CLK1</i>     | p.N99S                                          | missense_variant     |
| JJN3      | 3   | 123813715   | C   | T   | <i>KALRN</i>    | p.L11F                                          | missense_variant     |
| JJN3      | 3   | 178937382   | G   | T   | <i>PIK3CA</i>   | p.W590C                                         | missense_variant     |
| JJN3      | 3   | 195594063   | G   | T   | <i>TNK2</i>     | p.Q987K                                         | missense_variant     |
| JJN3      | 4   | 956276      | C   | T   | <i>DGKQ</i>     | p.A721T                                         | missense_variant     |
| JJN3      | 5   | 149449785   | G   | T   | <i>CSF1R</i>    | p.P427T                                         | missense_variant     |
| JJN3      | 7   | 6085767     | C   | A   | <i>EIF2AK1</i>  | p.D189Y                                         | missense_variant     |
| JJN3      | 9   | 96054921    | C   | A   | <i>WNK2</i>     | p.A1762D                                        | missense_variant     |
| JJN3      | 12  | 40677790    | G   | T   | <i>LRRK2</i>    | p.Q785H                                         | missense_variant     |
| JJN3      | 13  | 28901667    | C   | T   | <i>FLT1</i>     | p.E910K                                         | missense_variant     |
| JJN3      | 16  | 89762172    | G   | A   | <i>CDK10</i>    | p.E270K                                         | missense_variant     |
| JJN3      | 17  | 4795012     | G   | C   | <i>MINK1</i>    |                                                 | splice_donor_variant |
| JJN3      | 19  | 40886274    | C   | A   | <i>HIPK4</i>    | p.D542Y                                         | missense_variant     |
| JJN3      | 19  | 47207756    | T   | A   | <i>PRKD2</i>    | p.E221V                                         | missense_variant     |
| KJON      | 2   | 42275643    | C   | G   | <i>PKDCC</i>    | p.P102A                                         | missense_variant     |
| KJON      | 2   | 128087575   | A   | T   | <i>MAP3K2</i>   | p.L130I                                         | missense_variant     |
| KJON      | 2   | 209101880   | C   | T   | <i>IDH1</i>     | p.D390N                                         | missense_variant     |
| KJON      | 2   | 220354391   | C   | A   | <i>SPEG</i>     | p.P2884Q                                        | missense_variant     |
| KJON      | 3   | 49940577    | G   | T   | <i>MST1R</i>    | p.H156N                                         | missense_variant     |
| KJON      | 3   | 96962802    | C   | A   | <i>EPHA6</i>    | p.P426H                                         | missense_variant     |
| KJON      | 5   | 14485179    | T   | G   | <i>TRIO</i>     | p.V2220G                                        | missense_variant     |
| KJON      | 5   | 110782454   | C   | T   | <i>CAMK4</i>    | p.P177L                                         | missense_variant     |
| KJON      | 5   | 149636165   | G   | T   | <i>CAMK2A</i>   | p.Q128K                                         | missense_variant     |
| KJON      | 7   | 40041484    | T   | A   | <i>CDK13</i>    | p.V736E                                         | missense_variant     |
| KJON      | 7   | 55233024    | G   | A   | <i>EGFR</i>     | p.V592I                                         | missense_variant     |
| KJON      | 7   | 55259436    | C   | T   | <i>EGFR</i>     | p.R832C                                         | missense_variant     |
| KJON      | 7   | 116339499   | G   | A   | <i>MET</i>      | p.V121I                                         | missense_variant     |
| KJON      | 10  | 75585071    | G   | A   | <i>CAMK2G</i>   | p.P342L,p.P363L                                 | missense_variant     |
| KJON      | 11  | 113711409   | G   | C   | <i>USP28</i>    | p.P149A                                         | missense_variant     |

|       |    |           |   |   |          |                  |                      |
|-------|----|-----------|---|---|----------|------------------|----------------------|
| KJON  | 12 | 25380275  | T | G | KRAS     | p.Q61H           | missense_variant     |
| KJON  | 12 | 121693589 | T | C | CAMKK2   | p.Q272R          | missense_variant     |
| KJON  | 17 | 7577579   | G | T | TP53     | p.Y234X          | stop_gained          |
| KJON  | 17 | 21207813  | T | G | MAP2K3   | p.L215W          | missense_variant     |
| KJON  | 19 | 15374244  | G | T | BRD4     | p.A443D          | missense_variant     |
| KJON  | X  | 153283793 | T | C | IRAK1    | p.E248G          | missense_variant     |
| OH2   | 1  | 115256530 | G | T | NRAS     | p.Q61K           | missense_variant     |
| OH2   | 1  | 227174346 | C | T | ADCK3    | p.L618F          | missense_variant     |
| OH2   | 5  | 108294975 | T | C | FER      | p.I528T          | missense_variant     |
| OH2   | 5  | 180047927 | C | T | FLT4     | p.V750M          | missense_variant     |
| OH2   | 7  | 55233024  | G | A | EGFR     | p.V592I          | missense_variant     |
| OH2   | 16 | 2607765   | T | C | PDPK1    | p.V29A           | missense_variant     |
| U_266 | 2  | 37513440  | C | A | PRKD3    | p.V264L          | missense_variant     |
| U_266 | 3  | 43344924  | C | T | SNRK     | p.R77C           | missense_variant     |
| U_266 | 3  | 89521651  | A | G | EPHA3    | p.I910V          | missense_variant     |
| U_266 | 4  | 48116409  | G | C | TXK      | p.I9M            | missense_variant     |
| U_266 | 4  | 66233102  | C | T | EPHA5    | p.E633K          | missense_variant     |
| U_266 | 5  | 146619243 | G | T | STK32A   | p.E16X           | stop_gained          |
| U_266 | 5  | 180030301 | C | A | FLT4     | p.G1328V         | missense_variant     |
| U_266 | 6  | 117715378 | A | G | ROS1     | p.S371P          | missense_variant     |
| U_266 | 7  | 106508148 | C | T | PIK3CG   | p.Q48X           | stop_gained          |
| U_266 | 7  | 140453132 | T | A | BRAF     | p.K601N          | missense_variant     |
| U_266 | 9  | 77436584  | C | G | TRPM6    |                  | splice_donor_variant |
| U_266 | 13 | 48934228  | A | G | RB1      | p.K228R          | missense_variant     |
| U_266 | 13 | 48951156  | G | T | RB1      | p.E440X          | stop_gained          |
| U_266 | 16 | 22237255  | T | C | EEF2K    | p.Y69H           | missense_variant     |
| U_266 | 16 | 68842727  | T | G | CDH1     | p.D221E          | missense_variant     |
| U_266 | 17 | 7578449   | C | T | TP53     | p.A161T          | missense_variant     |
| U_266 | 17 | 48276647  | C | A | COL1A1   | p.Q137H          | missense_variant     |
| U_266 | 18 | 56205120  | C | T | ALPK2    | p.D767N          | missense_variant     |
| U_266 | 20 | 45317948  | G | T | TP53RK   | p.L36M           | missense_variant     |
| U_266 | 22 | 21083927  | G | A | PI4KA    | p.S1494F,p.S246F | missense_variant     |
| URVIN | 1  | 2105417   | A | T | PRKCZ    | p.D456V          | missense_variant     |
| URVIN | 1  | 22920174  | A | T | EPHA8    | p.K533I          | missense_variant     |
| URVIN | 1  | 46509345  | T | G | PIK3R3   | p.X462Y          | stop_lost            |
| URVIN | 2  | 201718121 | G | C | CLK1     | p.Q455E          | missense_variant     |
| URVIN | 4  | 1806119   | G | A | FGFR3    | p.G380R          | missense_variant     |
| URVIN | 6  | 3106057   | C | T | RIPK1    | p.H450Y          | missense_variant     |
| URVIN | 6  | 117662760 | G | A | ROS1     | p.R1569W         | missense_variant     |
| URVIN | 7  | 39990433  | G | C | CDK13    | p.G65R           | missense_variant     |
| URVIN | 7  | 143092553 | G | A | EPHA1    | p.Q648X          | stop_gained          |
| URVIN | 9  | 35609159  | G | A | TESK1    | p.R434H          | missense_variant     |
| URVIN | 11 | 64606221  | G | A | CDC42BPG | p.R344W          | missense_variant     |
| URVIN | 11 | 111593408 | A | C | SIK2     | p.K692T          | missense_variant     |
| URVIN | 11 | 111593426 | A | C | SIK2     | p.Q698P          | missense_variant     |
| URVIN | 12 | 18466960  | C | T | PIK3C2G  | p.Q367X          | stop_gained          |
| URVIN | 15 | 101523786 | C | G | LRRK1    | p.Y105X          | stop_gained          |
| URVIN | 15 | 101523788 | T | A | LRRK1    | p.L106Q          | missense_variant     |
| URVIN | 17 | 56676452  | C | G | TEX14    | p.E758Q          | missense_variant     |
| URVIN | 18 | 18625344  | T | C | ROCK1    | p.N167D          | missense_variant     |
| VOLIN | 1  | 45115418  | C | A | RNF220   | p.R511S          | missense_variant     |
| VOLIN | 1  | 198231712 | A | G | NEK7     | p.D69G           | missense_variant     |
| VOLIN | 2  | 220348261 | C | G | SPEG     | p.R2026G         | missense_variant     |
| VOLIN | 5  | 96498899  | A | C | RIOK2    | p.L509V          | missense_variant     |
| VOLIN | 7  | 98601827  | G | A | TRRAP    | p.V3428I         | missense_variant     |
| VOLIN | 8  | 42147690  | G | A | IKBKB    | p.V73M           | missense_variant     |
| VOLIN | 10 | 89720653  | C | A | PTEN     | p.D268E          | missense_variant     |
| VOLIN | 12 | 1005356   | G | T | WNK1     | p.E1901D         | missense_variant     |
| VOLIN | 12 | 96717807  | G | A | CDK17    | p.P68S           | missense_variant     |
| VOLIN | 17 | 7290737   | C | T | TNK1     | p.R485W          | missense_variant     |
| VOLIN | 17 | 7578542   | G | C | TP53     | p.L130V          | missense_variant     |
| VOLIN | 17 | 74383275  | G | A | SPHK1    | p.E255K          | missense_variant     |
| VOLIN | 19 | 49130979  | C | A | SPHK2    | p.P181H          | missense_variant     |
| VOLIN | 20 | 30674511  | G | A | HCK      | p.A306T          | missense_variant     |
