# Supplementary figures and images for: Mutational analysis and protein profiling predict drug sensitivity in multiple myeloma cell lines
Source: Frontiers journal article supplement (doi:10.3389/fonc.2022.1040730), 2022-11-29

Supplementary Figure 1

A

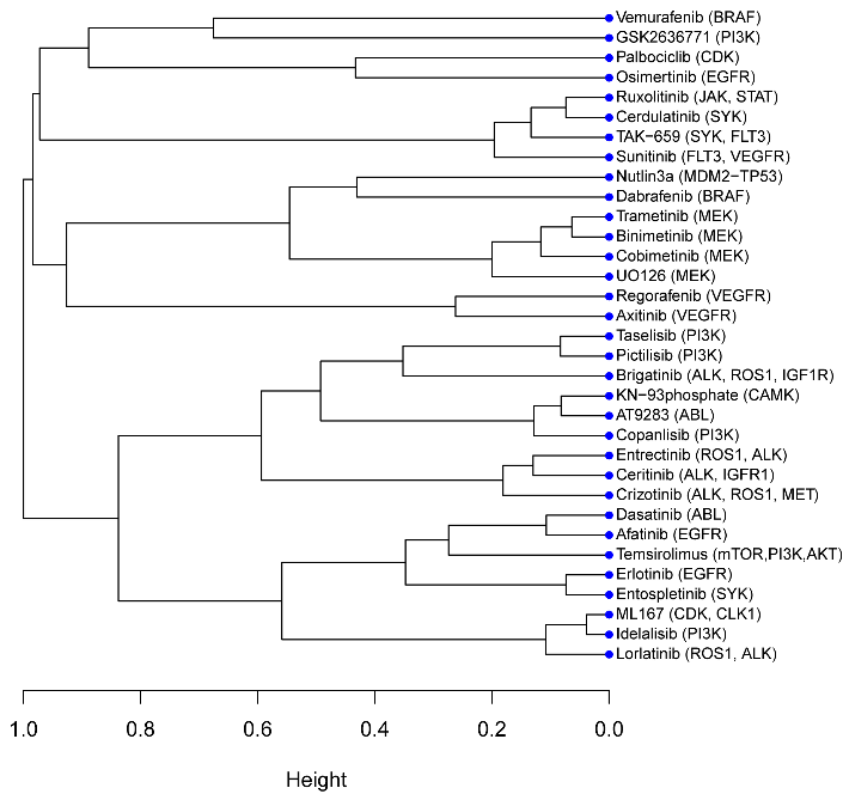

B

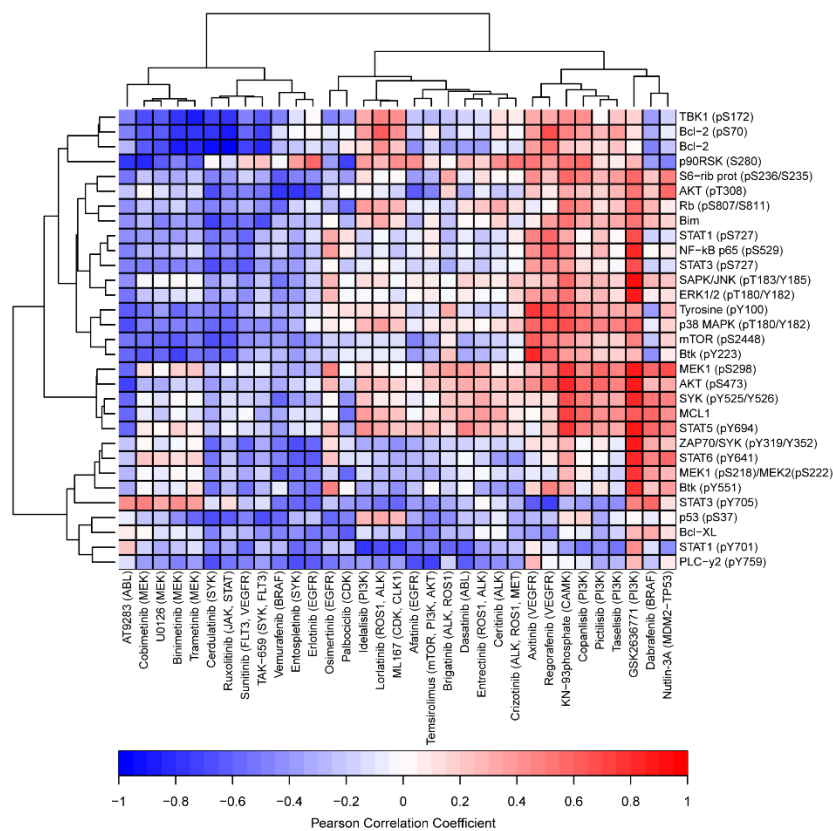

Supplementary Figure 2

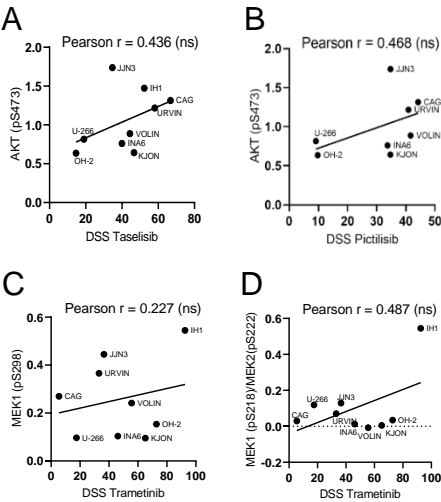

Supplement: Data_Sheet_1.zip [file Data_Sheet_1.zip]
